# Supplementary material for: Fusion of tethered membranes can be driven by Sec18/NSF and Sec17/αSNAP without HOPS
Source: eLife journal article supplement (doi:10.7554/elife.73240), 2021-10-26
Supplement: supp [file elife_poa_e73240_Figure_1_source_data_1.xlsx]

## Sheet: R&3Q(WT) HOPS 
Replicate1						Replicate2						Replicate3						Replicate4						Replicate5
0	0.0642366	0.0414558	0.0891568	0.11521		0	0.0364559	0.0400129	0.0926038	0.0772499		0	-0.00514952	-0.00718215	0.0440681	0.0550834		0	-0.00429719	-0.0125127	0.0703079	0.10074		0	0.0487159	0.0453281	0.101127	0.126356
1	0.153702	0.0801604	0.151078	0.180228		1	0.106353	0.078361	0.158686	0.132478		1	0.0870832	0.0396377	0.118647	0.111855		1	0.0882427	0.0429488	0.145506	0.17887		1	0.116159	0.0788973	0.150746	0.17984
2	0.221133	0.115352	0.193548	0.227982		2	0.165188	0.110137	0.207494	0.172029		2	0.156504	0.0775754	0.179661	0.159276		2	0.192061	0.106189	0.218862	0.253319		2	0.190792	0.125579	0.208673	0.23208
3	0.270809	0.142644	0.231598	0.268504		3	0.209644	0.136667	0.244399	0.201236		3	0.209316	0.105409	0.225282	0.193915		3	0.263301	0.139766	0.277657	0.305005		3	0.247578	0.157089	0.252277	0.272843
4	0.308416	0.160648	0.267048	0.298935		4	0.253637	0.158745	0.28191	0.230723		4	0.249167	0.131859	0.248653	0.22103		4	0.31868	0.176188	0.314973	0.343305		4	0.296664	0.182891	0.287426	0.30571
5	0.335296	0.177945	0.291582	0.322184		5	0.287734	0.180662	0.30654	0.253289		5	0.277993	0.161008	0.281116	0.256031		5	0.36223	0.201966	0.35539	0.375162		5	0.328737	0.20291	0.312574	0.329218
6	0.358499	0.195657	0.309898	0.339357		6	0.313143	0.200254	0.33203	0.273285		6	0.313469	0.179162	0.30833	0.270579		6	0.390691	0.230417	0.384042	0.411288		6	0.355919	0.219105	0.330526	0.349205
7	0.373772	0.211668	0.33119	0.361709		7	0.334126	0.213255	0.354102	0.29241		7	0.326791	0.199651	0.330408	0.29492		7	0.415231	0.248093	0.405545	0.427718		7	0.374865	0.238473	0.353829	0.372068
8	0.387521	0.22378	0.345031	0.372432		8	0.355233	0.230059	0.366191	0.309288		8	0.353399	0.214543	0.357162	0.311819		8	0.442616	0.268404	0.426252	0.458576		8	0.394159	0.249915	0.369927	0.387335
9	0.401158	0.232752	0.365167	0.390179		9	0.364926	0.235555	0.375644	0.318827		9	0.375298	0.22691	0.375344	0.333269		9	0.455328	0.27597	0.439354	0.467662		9	0.404042	0.259337	0.386501	0.401287
10	0.409146	0.243313	0.373032	0.397459		10	0.376648	0.246497	0.389289	0.331906		10	0.389832	0.236006	0.390246	0.344848		10	0.47243	0.288376	0.45666	0.488502		10	0.419865	0.271147	0.387323	0.410965
11	0.417633	0.253855	0.383531	0.412477		11	0.390785	0.256881	0.396628	0.345768		11	0.41211	0.248749	0.405957	0.366904		11	0.478927	0.302758	0.463778	0.494021		11	0.423887	0.28069	0.403586	0.428597
12	0.429089	0.259473	0.394665	0.422058		12	0.394493	0.26216	0.40725	0.355821		12	0.432241	0.270113	0.424004	0.382333		12	0.499873	0.324831	0.49099	0.515452		12	0.433442	0.293544	0.412137	0.43397
13	0.430783	0.270502	0.402482	0.425485		13	0.402837	0.272198	0.419569	0.361466		13	0.429026	0.274426	0.434046	0.395175		13	0.496564	0.327808	0.492395	0.513449		13	0.444147	0.297608	0.418219	0.449724
14	0.439824	0.277785	0.418965	0.439193		14	0.411632	0.28395	0.428545	0.368913		14	0.441669	0.28159	0.44921	0.402531		14	0.51959	0.3364	0.49793	0.535058		14	0.442887	0.307857	0.425065	0.45344
15	0.439645	0.279637	0.415133	0.437674		15	0.417476	0.289953	0.432851	0.374743		15	0.457943	0.296509	0.465551	0.428167		15	0.511095	0.341733	0.501999	0.53043		15	0.446162	0.315298	0.43283	0.463441
16	0.446889	0.288089	0.425796	0.447423		16	0.421527	0.29763	0.438491	0.387746		16	0.462921	0.305236	0.477709	0.42618		16	0.529001	0.350316	0.513559	0.53429		16	0.454805	0.321042	0.440158	0.470176
17	0.455177	0.295343	0.433523	0.452385		17	0.426612	0.302506	0.444819	0.390551		17	0.465563	0.30588	0.481689	0.431853		17	0.528626	0.352229	0.519684	0.543033		17	0.452259	0.318898	0.438282	0.471712
18	0.453414	0.298631	0.44026	0.455273		18	0.430084	0.305482	0.446233	0.398154		18	0.470092	0.317993	0.484271	0.445886		18	0.532342	0.363734	0.522262	0.535082		18	0.455416	0.32618	0.439923	0.478368
19	0.461421	0.30801	0.443571	0.461562		19	0.433482	0.315218	0.449478	0.408271		19	0.485732	0.323375	0.493807	0.456216		19	0.54016	0.367423	0.530184	0.546576		19	0.456171	0.336748	0.440722	0.479555
20	0.463671	0.306119	0.447987	0.464098		20	0.437126	0.316559	0.448304	0.411808		20	0.491217	0.339051	0.504663	0.456214		20	0.538068	0.369109	0.52782	0.547792		20	0.462696	0.337606	0.44762	0.486609
21	0.463145	0.3084	0.449415	0.461376		21	0.44358	0.322217	0.458456	0.416082		21	0.498297	0.33795	0.502793	0.469911		21	0.547367	0.367521	0.5317	0.544284		21	0.464736	0.343956	0.451548	0.490991
22	0.470075	0.316429	0.455927	0.469683		22	0.445885	0.326008	0.454973	0.420415		22	0.509092	0.344262	0.519171	0.489579		22	0.551288	0.380031	0.541151	0.561909		22	0.462727	0.354151	0.451672	0.495726
23	0.472428	0.322701	0.458645	0.469558		23	0.442824	0.329024	0.45698	0.423946		23	0.510821	0.350184	0.519829	0.491384		23	0.557634	0.385287	0.542442	0.56373		23	0.468296	0.351838	0.453011	0.497066
24	0.473707	0.318335	0.456372	0.476082		24	0.453468	0.334677	0.46114	0.428339		24	0.521214	0.355075	0.524642	0.495107		24	0.559051	0.385966	0.543419	0.560012		24	0.469825	0.359477	0.454036	0.496543
25	0.47295	0.32436	0.456612	0.479708		25	0.451096	0.336024	0.457243	0.430748		25	0.515375	0.361238	0.5249	0.49553		25	0.555886	0.380196	0.539262	0.550465		25	0.473897	0.355461	0.45539	0.500555
26	0.481813	0.32911	0.460637	0.473161		26	0.458154	0.33935	0.459721	0.435904		26	0.523617	0.359589	0.523522	0.501703		26	0.560879	0.387296	0.545539	0.555519		26	0.475597	0.359793	0.452232	0.49916
27	0.483835	0.329342	0.458495	0.480774		27	0.457288	0.337117	0.460379	0.438157		27	0.528808	0.369469	0.524653	0.505366		27	0.55944	0.388572	0.549965	0.55472		27	0.478618	0.366058	0.455397	0.504947
28	0.490411	0.333918	0.460919	0.479847		28	0.459131	0.342067	0.459621	0.442574		28	0.541747	0.375085	0.542426	0.516381		28	0.567648	0.402827	0.55479	0.553331		28	0.479959	0.370186	0.460049	0.499135
29	0.482767	0.334925	0.459751	0.478477		29	0.459909	0.341834	0.459873	0.440861		29	0.534206	0.383495	0.534582	0.513013		29	0.567005	0.39549	0.554856	0.564798		29	0.4769	0.372008	0.449702	0.50124
30	0.48844	0.336576	0.462946	0.481931		30	0.465618	0.349044	0.461172	0.44649		30	0.541761	0.385278	0.540944	0.527302		30	0.579594	0.390112	0.555442	0.565579		30	0.48997	0.423477	0.458924	0.577404
31	0.496921	0.351864	0.494747	0.542888		31	0.483387	0.389993	0.474581	0.492559		31	0.565251	0.484978	0.548956	0.527261		31	0.592658	0.394744	0.576835	0.652907		31	0.482039	0.452808	0.466248	0.575479
32	0.498609	0.378993	0.50071	0.531276		32	0.480188	0.41355	0.471587	0.487585		32	0.573935	0.46512	0.576168	0.536463		32	0.602598	0.419294	0.603574	0.660521		32	0.483591	0.486703	0.467704	0.571826
33	0.498456	0.402469	0.502023	0.544539		33	0.477957	0.433909	0.490006	0.49788		33	0.560942	0.495319	0.613606	0.55039		33	0.603489	0.449921	0.664164	0.646445		33	0.487624	0.511112	0.498377	0.572789
34	0.495399	0.420671	0.505065	0.537579		34	0.475341	0.444778	0.500169	0.50298		34	0.555119	0.502161	0.605232	0.561094		34	0.605705	0.489553	0.669679	0.651412		34	0.492447	0.52446	0.504773	0.570147
35	0.498082	0.423156	0.501925	0.523566		35	0.474428	0.449751	0.510366	0.515914		35	0.571183	0.523895	0.605745	0.567266		35	0.607075	0.495477	0.626914	0.663392		35	0.486646	0.529919	0.490019	0.565003
36	0.502023	0.435095	0.500321	0.525716		36	0.469847	0.451997	0.496259	0.502739		36	0.576446	0.526577	0.592885	0.571871		36	0.616713	0.530901	0.59038	0.645979		36	0.487409	0.534426	0.48485	0.569131
37	0.493691	0.428274	0.499966	0.498246		37	0.488606	0.458139	0.509807	0.491889		37	0.587403	0.52705	0.583663	0.567344		37	0.639408	0.529665	0.607816	0.661025		37	0.491625	0.531041	0.475558	0.565332
38	0.509108	0.438366	0.50904	0.508038		38	0.505352	0.45865	0.514516	0.488571		38	0.586848	0.533943	0.588194	0.573152		38	0.635946	0.521276	0.598866	0.682359		38	0.504368	0.538788	0.49686	0.567432
39	0.501564	0.437439	0.492873	0.526515		39	0.503267	0.459238	0.516639	0.478755		39	0.575482	0.534955	0.584264	0.571642		39	0.647635	0.497806	0.614362	0.697061		39	0.490829	0.534469	0.482899	0.567472
40	0.509253	0.441903	0.490295	0.550955		40	0.497274	0.45895	0.508629	0.488769		40	0.593252	0.548683	0.603125	0.59253		40	0.638315	0.512291	0.629033	0.686396		40	0.484474	0.539699	0.489137	0.567763
41	0.505533	0.439377	0.487296	0.52018		41	0.494333	0.460526	0.505932	0.482637		41	0.576551	0.539599	0.643893	0.580579		41	0.646355	0.544325	0.634531	0.681278		41	0.503294	0.540992	0.479598	0.567242
42	0.501448	0.439363	0.49399	0.508631		42	0.482643	0.461156	0.506363	0.487837		42	0.570314	0.541039	0.633269	0.579835		42	0.643067	0.522846	0.589337	0.701596		42	0.486924	0.538724	0.489864	0.564096
43	0.511735	0.451499	0.510331	0.506308		43	0.504993	0.468533	0.502153	0.498124		43	0.590796	0.553109	0.648422	0.596499		43	0.634132	0.547693	0.582276	0.666392		43	0.481542	0.536614	0.499923	0.558458
44	0.511799	0.452701	0.521199	0.518994		44	0.525631	0.470057	0.506558	0.503545		44	0.587379	0.554364	0.643998	0.592316		44	0.642156	0.521364	0.591193	0.648978		44	0.470316	0.539403	0.489438	0.558602
45	0.52221	0.458706	0.53005	0.526036		45	0.536963	0.463128	0.515608	0.516659		45	0.575448	0.552671	0.656545	0.604029		45	0.61682	0.521241	0.712006	0.625899		45	0.463382	0.537477	0.479622	0.576411
46	0.513643	0.455694	0.52866	0.49514		46	0.543428	0.46859	0.508415	0.509434		46	0.604523	0.563739	0.644535	0.612951		46	0.612796	0.567987	0.603026	0.640683		46	0.474276	0.538132	0.491862	0.563433
47	0.519573	0.460414	0.532223	0.510914		47	0.532935	0.469883	0.512896	0.498292		47	0.602246	0.566798	0.644482	0.632226		47	0.622834	0.540954	0.627262	0.696763		47	0.490707	0.540476	0.539918	0.573996
48	0.519239	0.461311	0.57071	0.522386		48	0.511105	0.477881	0.534665	0.499865		48	0.612059	0.568109	0.670401	0.63233		48	0.616433	0.544364	0.669103	0.684014		48	0.478185	0.542542	0.535994	0.618255
49	0.523351	0.463288	0.529353	0.544797		49	0.504645	0.476269	0.553709	0.49142		49	0.612538	0.577289	0.64462	0.64656		49	0.662221	0.574171	0.653368	0.665014		49	0.501448	0.540249	0.532028	0.589276
50	0.52138	0.464374	0.523579	0.564449		50	0.517366	0.476642	0.514392	0.495192		50	0.584844	0.587882	0.641963	0.630587		50	0.680053	0.528904	0.618742	0.667153		50	0.501032	0.54132	0.527421	0.591595
51	0.519014	0.466005	0.513364	0.611409		51	0.536258	0.486027	0.526187	0.510824		51	0.589668	0.577526	0.598936	0.620639		51	0.69507	0.556146	0.628289	0.639072		51	0.503259	0.539149	0.563953	0.558708
52	0.516406	0.475373	0.509208	0.595626		52	0.533894	0.489166	0.53095	0.507873		52	0.582259	0.592333	0.597122	0.620108		52	0.723521	0.602728	0.641802	0.63207		52	0.506989	0.548762	0.537604	0.558891
53	0.508443	0.475952	0.518637	0.588929		53	0.55895	0.494485	0.538735	0.529275		53	0.591926	0.586898	0.600189	0.608039		53	0.753202	0.555377	0.627728	0.684569		53	0.511451	0.552155	0.524367	0.546592
54	0.518578	0.483655	0.531558	0.601008		54	0.601266	0.493065	0.529531	0.52539		54	0.578987	0.59178	0.64144	0.626135		54	0.778724	0.60915	0.659221	0.704711		54	0.532533	0.546481	0.52747	0.553951
55	0.50029	0.494006	0.531411	0.596453		55	0.555581	0.496963	0.514522	0.530737		55	0.579911	0.599062	0.662009	0.640324		55	0.78056	0.599318	0.611493	0.640499		55	0.55472	0.550919	0.545886	0.556834
56	0.50709	0.4953	0.537437	0.579571		56	0.558893	0.496552	0.535743	0.540352		56	0.576563	0.609247	0.643925	0.65383		56	0.787259	0.643161	0.651545	0.631471		56	0.547541	0.549883	0.572295	0.556934
57	0.521988	0.487358	0.526215	0.511333		57	0.584272	0.509876	0.545304	0.551039		57	0.550736	0.612542	0.684113	0.639023		57	0.78079	0.584979	0.657869	0.619063		57	0.588337	0.55213	0.588773	0.5262
58	0.527671	0.489108	0.530192	0.498555		58	0.612893	0.501783	0.558609	0.546595		58	0.559321	0.605576	0.703761	0.605374		58	0.72869	0.668962	0.624651	0.609251		58	0.556988	0.548801	0.599658	0.539135
59	0.532103	0.485443	0.550316	0.530285		59	0.601279	0.503656	0.548427	0.544635		59	0.573421	0.617448	0.709321	0.637333		59	0.692933	0.609521	0.643949	0.611684		59	0.547233	0.5501	0.58908	0.558696
60	0.536175	0.473615	0.553313	0.554394		60	0.619993	0.500812	0.548041	0.568276		60	0.603221	0.618596	0.71265	0.681595		60	0.683486	0.671005	0.727723	0.628183		60	0.571754	0.555713	0.581417	0.555117

## Sheet: R&3Q(3D) HOPS
Replicate1						Replicate2						Replicate3						Replicate4						Replicate5
0	0.0637051	0.006789	0.00775427	0.0115634		0	0.000821887	0.00597938	0.0126101	0.0141476		0	0.00615875	0.0138236	0.0034382	-0.0377452		0	0.0307396	-0.0765267	-0.0666267	-0.0547848		0	0.0356365	-0.0133587	0.0068063	-0.000109585
1	0.135779	0.0107798	0.00835493	0.0101421		1	0.0434463	0.00928547	0.0140363	0.0177762		1	0.0812033	0.0108581	0.00132489	-0.0339786		1	0.109191	-0.0655639	-0.0631797	-0.0532464		1	0.0807415	-0.00983058	0.00778455	0.0032488
2	0.182971	0.0127635	0.00758124	0.0118885		2	0.110129	0.0121429	0.0128214	0.0163327		2	0.0886954	0.0102438	0.00673202	-0.0342914		2	0.174792	-0.0706968	-0.0605293	-0.0533013		2	0.126449	-0.00938022	-0.0102328	0.00458253
3	0.222434	0.0175725	0.00953772	0.0111135		3	0.143741	0.00596455	0.0113087	0.015952		3	0.137139	0.00647016	0.0046272	-0.0311363		3	0.242704	-0.0656521	-0.0619492	-0.0541819		3	0.16703	-0.00727137	-0.00418962	0.00476027
4	0.256622	0.0177777	0.0104227	0.00976637		4	0.177358	0.00961298	0.0116757	0.0174376		4	0.175153	0.00607949	0.00288475	-0.0402619		4	0.29435	-0.0656998	-0.0589996	-0.0553718		4	0.20154	-0.00715644	-0.00295479	0.00624635
5	0.288224	0.0191175	0.0103534	0.0123655		5	0.20598	0.0101222	0.0124482	0.0144121		5	0.212822	0.00639089	-0.00019109	-0.0399661		5	0.336452	-0.0641744	-0.0644723	-0.0539679		5	0.23187	-0.00743709	0.000497142	0.00423239
6	0.313215	0.0219651	0.00757753	0.0116821		6	0.226197	0.00997387	0.0122826	0.0169939		6	0.24232	0.0096097	-0.00165045	-0.0383666		6	0.376151	-0.0534531	-0.0640038	-0.0538884		6	0.258204	-0.00822824	-0.00216631	0.00628778
7	0.336994	0.0254109	0.00823752	0.0103485		7	0.246526	0.0108576	0.0150424	0.0147495		7	0.274513	0.0022124	-0.000376518	-0.0362929		7	0.406752	-0.0557579	-0.0632867	-0.0545809		7	0.285047	-0.00473354	-0.00418428	0.0054552
8	0.356337	0.0290766	0.00974907	0.00998513		8	0.265996	0.00995904	0.0133368	0.0145505		8	0.302424	0.00627765	-0.0016547	-0.037138		8	0.439388	-0.0524714	-0.0617988	-0.0534748		8	0.310884	-0.00419764	-0.00283852	0.00469078
9	0.383214	0.0307031	0.00959952	0.0130564		9	0.282908	0.00914828	0.0105572	0.011934		9	0.326244	0.00344811	0.0019661	-0.0392966		9	0.472238	-0.0500987	-0.0632274	-0.0564881		9	0.32987	-0.00495538	-0.00101433	0.00495939
10	0.395482	0.0312346	0.00836605	0.012525		10	0.300319	0.00988118	0.00969085	0.0143935		10	0.344999	-0.000237801	-0.00523303	-0.0408168		10	0.491469	-0.0517528	-0.0643147	-0.056089		10	0.351594	-0.00215696	-0.0044088	0.00421502
11	0.409195	0.0343665	0.00970952	0.0120887		11	0.314314	0.0108959	0.0117029	0.0114434		11	0.373613	0.0053038	-0.00274745	-0.0366496		11	0.502118	-0.048446	-0.0651533	-0.0535688		11	0.368334	-0.00606861	-0.00554875	0.00559552
12	0.421575	0.0342354	0.0106958	0.0132838		12	0.328072	0.0113915	0.0113025	0.0134493		12	0.40548	0.0020482	0.000283096	-0.0389455		12	0.521753	-0.0509763	-0.0603515	-0.0590415		12	0.382929	-0.00480036	-0.00423239	0.00408672
13	0.439379	0.0377603	0.0113929	0.0137127		13	0.344783	0.0111517	0.0103706	0.0106462		13	0.409821	0.0046909	-0.00346085	-0.0354918		13	0.517724	-0.0480209	-0.06893	-0.0565806		13	0.396892	-0.00197253	-0.00343188	0.0066887
14	0.448363	0.0380508	0.0117031	0.0124842		14	0.356266	0.0105745	0.0104114	0.0130142		14	0.436643	-0.00182172	-0.00525285	-0.0405691		14	0.531894	-0.0456309	-0.0659153	-0.0561483		14	0.408698	0.00166115	-0.00324479	0.00517322
15	0.445375	0.0390544	0.0126325	0.0105648		15	0.368782	0.00980332	0.0130105	0.0124037		15	0.454899	0.00238367	-0.00469515	-0.0376504		15	0.52615	-0.0414436	-0.0620938	-0.0632447		15	0.41709	-0.000538571	-0.00241755	0.00267682
16	0.459555	0.0417363	0.00922379	0.00944874		16	0.378025	0.0103718	0.0112951	0.0110961		16	0.464493	-0.00307159	-0.00972718	-0.0346835		16	0.536415	-0.0419829	-0.0622008	-0.0547299		16	0.428987	-0.00163175	-0.0025552	0.00745179
17	0.462429	0.0454701	0.0117983	0.0109912		17	0.395037	0.0143849	0.00978354	0.0136013		17	0.47709	0.00260873	-0.00897273	-0.0365519		17	0.540183	-0.0332714	-0.0614272	-0.0554268		17	0.432953	-0.00211018	-0.00496207	0.00666999
18	0.467251	0.0454318	0.00879616	0.01483		18	0.396621	0.0115484	0.00804955	0.0130254		18	0.493368	-0.00418416	-0.00810787	-0.0409824		18	0.544511	-0.0356962	-0.0685179	-0.0559025		18	0.438124	0.00157428	-0.00627174	0.00642008
19	0.470781	0.0483128	0.0100766	0.0110258		19	0.413267	0.011986	0.0104695	0.0131403		19	0.504054	-0.00379632	-0.00843768	-0.0400156		19	0.5525	-0.0312992	-0.0655683	-0.0548658		19	0.443431	0.000792487	-0.00269018	0.0020594
20	0.480297	0.0491878	0.0121752	0.0135434		20	0.415557	0.0101086	0.00994421	0.011782		20	0.518836	0.000475601	-0.00777806	-0.0375272		20	0.54348	-0.0320887	-0.0667582	-0.0545752		20	0.456847	-0.000773778	-0.00140857	0.00226788
21	0.476255	0.0518426	0.0104288	0.0120664		21	0.423041	0.0124556	0.0100418	0.0128462		21	0.523375	0.00048551	-0.0119509	-0.0379674		21	0.566691	-0.0268184	-0.0672151	-0.0573469		21	0.459874	0.00278373	-0.00161705	0.00442082
22	0.481882	0.0539598	0.0105623	0.011158		22	0.430578	0.0130637	0.00898266	0.0109305		22	0.527007	0.000969604	-0.00805408	-0.0385577		22	0.558652	-0.0250269	-0.0608749	-0.05963		22	0.464737	0.00362967	-0.00161838	0.00376331
23	0.484163	0.0558396	0.0105833	0.0138796		23	0.434425	0.0110701	0.0103582	0.0119612		23	0.542929	-0.00225203	-0.0119113	-0.0356007		23	0.571082	-0.0216884	-0.0639503	-0.0595808		23	0.466983	0.000681566	-0.00369382	0.0047576
24	0.4863	0.0553329	0.0105116	0.0147262		24	0.440122	0.0142749	0.00824235	0.0121145		24	0.543244	-0.000941294	-0.0115404	-0.0354606		24	0.553152	-0.0194877	-0.0695025	-0.0575942		24	0.474212	0.00397313	-0.00227857	0.00368179
25	0.487557	0.060724	0.0136929	0.013536		25	0.446456	0.0125013	0.0070089	0.0132169		25	0.547737	-0.00197318	-0.0126402	-0.0430943		25	0.550856	-0.0215669	-0.0636134	-0.0575045		25	0.473504	0.00543114	-0.00262737	0.00391165
26	0.490501	0.0603508	0.0122382	0.0135867		26	0.448083	0.0146815	0.00902469	0.0137793		26	0.551511	-0.00292014	-0.0134173	-0.0398486		26	0.557685	-0.0199331	-0.0692958	-0.0593813		26	0.476695	0.00463331	-0.00315926	0.00643345
27	0.491814	0.0611937	0.0116042	0.013091		27	0.456875	0.015402	0.00922491	0.010797		27	0.556036	-0.00378499	-0.0138533	-0.0364274		27	0.556052	-0.0167174	-0.0679497	-0.061475		27	0.477393	0.00685575	-0.00365239	0.00668202
28	0.500328	0.0654095	0.00881594	0.0148003		28	0.455805	0.0146926	0.00738586	0.0106882		28	0.564962	-0.00224637	-0.010132	-0.0360523		28	0.570158	-0.0181604	-0.0663389	-0.0583272		28	0.480262	0.00880423	-0.00240553	0.00687981
29	0.489086	0.0624593	0.00939683	0.0135817		29	0.462908	0.01613	0.0078382	0.0136606		29	0.561738	-0.00568032	-0.0152858	-0.0397991		29	0.57613	-0.013561	-0.0670546	-0.0641079		29	0.477079	0.00500617	-0.00497008	0.00267548
30	0.489297	0.0652748	0.0119836	0.0131825		30	0.466812	0.0173091	0.00964141	0.0123678		30	0.549773	-0.000322729	-0.0213539	-0.0387955		30	0.569713	-0.00853654	-0.0662666	-0.0603472		30	0.487668	0.380851	0.414373	0.366416
31	0.508055	0.421259	0.378095	0.39705		31	0.476385	0.47594	0.399032	0.40205		31	0.556737	0.570836	0.584037	0.414232		31	0.592393	0.599198	0.430983	0.600204		31	0.488469	0.485895	0.49702	0.550324
32	0.506279	0.45884	0.408137	0.439437		32	0.477457	0.502933	0.434628	0.420906		32	0.563431	0.687294	0.579406	0.475318		32	0.593587	0.642723	0.496707	0.683252		32	0.490467	0.508854	0.516986	0.467355
33	0.51534	0.468153	0.41712	0.454759		33	0.477788	0.517899	0.447098	0.440678		33	0.561401	0.568055	0.596615	0.492063		33	0.586205	0.634441	0.507174	0.567518		33	0.487791	0.519824	0.528493	0.489456
34	0.51171	0.478442	0.425623	0.461867		34	0.481249	0.528147	0.455715	0.45801		34	0.556909	0.582831	0.615383	0.512445		34	0.591359	0.61637	0.526083	0.600873		34	0.496596	0.529311	0.534711	0.507076
35	0.509828	0.484907	0.43361	0.466806		35	0.48161	0.537321	0.464658	0.468988		35	0.57157	0.609775	0.637674	0.537165		35	0.581206	0.62289	0.533304	0.617235		35	0.494274	0.538159	0.525847	0.517616
36	0.5024	0.48643	0.447561	0.478583		36	0.477164	0.541156	0.476459	0.471798		36	0.564907	0.632434	0.641564	0.549606		36	0.587379	0.587769	0.549991	0.619306		36	0.495482	0.547697	0.538591	0.52586
37	0.507441	0.48683	0.455377	0.476059		37	0.479172	0.554575	0.48126	0.493152		37	0.568114	0.640079	0.657479	0.557429		37	0.604255	0.600802	0.560757	0.648203		37	0.494202	0.538849	0.5398	0.539979
38	0.514045	0.497142	0.464956	0.48562		38	0.477546	0.552197	0.485532	0.49357		38	0.565055	0.64993	0.664334	0.564458		38	0.598917	0.599504	0.559125	0.64555		38	0.491473	0.556961	0.54299	0.552003
39	0.517763	0.502491	0.473062	0.490023		39	0.489618	0.558521	0.490215	0.50581		39	0.572119	0.665664	0.666078	0.573908		39	0.605354	0.607336	0.564266	0.647584		39	0.493749	0.554189	0.534738	0.55619
40	0.522374	0.504706	0.481607	0.50094		40	0.490397	0.565718	0.491569	0.502599		40	0.581076	0.679113	0.674223	0.578955		40	0.590719	0.600535	0.570469	0.649069		40	0.505114	0.558641	0.540687	0.562186
41	0.524865	0.506723	0.485202	0.494005		41	0.498544	0.567993	0.498244	0.506532		41	0.586595	0.677554	0.67961	0.59097		41	0.602899	0.600418	0.575815	0.651542		41	0.512622	0.560982	0.54745	0.566385
42	0.524832	0.50775	0.49752	0.500328		42	0.492513	0.565596	0.49712	0.51067		42	0.577489	0.672356	0.675987	0.594095		42	0.617725	0.608114	0.583637	0.661397		42	0.512246	0.563998	0.538632	0.568229
43	0.529616	0.514801	0.499645	0.509331		43	0.509188	0.57026	0.501472	0.518889		43	0.590581	0.69266	0.689918	0.606528		43	0.620582	0.615828	0.582589	0.659117		43	0.508619	0.559583	0.54434	0.575256
44	0.538562	0.51328	0.498629	0.506661		44	0.510638	0.574358	0.503431	0.523716		44	0.594723	0.684393	0.68384	0.613002		44	0.621871	0.610522	0.575436	0.668394		44	0.527262	0.557094	0.548382	0.577853
45	0.540503	0.516921	0.505057	0.505122		45	0.509224	0.570325	0.499491	0.524618		45	0.584664	0.689674	0.681476	0.615672		45	0.630034	0.611514	0.590639	0.674047		45	0.523977	0.549183	0.549871	0.578444
46	0.531815	0.517885	0.507404	0.513163		46	0.514856	0.575652	0.508865	0.53082		46	0.596448	0.706707	0.692565	0.629681		46	0.624811	0.601002	0.583168	0.673085		46	0.532991	0.534362	0.550529	0.584925
47	0.531212	0.513838	0.511759	0.507662		47	0.512878	0.580418	0.510102	0.534732		47	0.595289	0.714478	0.686266	0.638271		47	0.611947	0.600607	0.587223	0.671875		47	0.522895	0.537113	0.545374	0.580514
48	0.535754	0.519516	0.509998	0.515057		48	0.519853	0.581835	0.51082	0.540487		48	0.602271	0.694875	0.683719	0.631014		48	0.633858	0.59199	0.594696	0.666216		48	0.518049	0.541937	0.557809	0.585931
49	0.534874	0.523035	0.514976	0.522739		49	0.5328	0.575879	0.516671	0.540175		49	0.609899	0.702486	0.687233	0.629539		49	0.610454	0.604216	0.591884	0.669466		49	0.518526	0.530353	0.556263	0.579871
50	0.546007	0.522381	0.526312	0.523252		50	0.541397	0.576648	0.51768	0.534496		50	0.608535	0.696868	0.682799	0.634608		50	0.616738	0.607305	0.596398	0.67372		50	0.511944	0.525537	0.553939	0.580947
51	0.547493	0.526047	0.523844	0.526862		51	0.541316	0.563995	0.521013	0.545177		51	0.615452	0.693022	0.694419	0.628458		51	0.637739	0.607175	0.597383	0.676618		51	0.510943	0.5346	0.549351	0.589839
52	0.546064	0.530113	0.526886	0.535706		52	0.530968	0.557663	0.516491	0.538021		52	0.632195	0.696163	0.696708	0.63689		52	0.634357	0.61085	0.594433	0.671067		52	0.51872	0.535896	0.543979	0.589071
53	0.542901	0.532425	0.527162	0.533209		53	0.53501	0.553402	0.518622	0.541412		53	0.627988	0.69883	0.691823	0.634144		53	0.663401	0.612177	0.59001	0.677484		53	0.546008	0.531113	0.538528	0.584703
54	0.547394	0.535287	0.534235	0.536751		54	0.555323	0.547766	0.5149	0.538601		54	0.630953	0.714885	0.701201	0.647186		54	0.717009	0.617523	0.5995	0.676777		54	0.5631	0.535255	0.537064	0.587099
55	0.551508	0.539547	0.535186	0.534758		55	0.559285	0.558374	0.521013	0.557762		55	0.638649	0.716172	0.694777	0.640519		55	0.672924	0.612702	0.591397	0.68157		55	0.566162	0.544888	0.546771	0.595672
56	0.547128	0.547227	0.53025	0.532839		56	0.540406	0.568077	0.529559	0.567437		56	0.658513	0.734571	0.707116	0.647997		56	0.670737	0.642944	0.603674	0.682449		56	0.549327	0.547577	0.54048	0.59305
57	0.544561	0.546169	0.534218	0.539689		57	0.527948	0.56067	0.517367	0.556705		57	0.66323	0.731607	0.70494	0.658401		57	0.709014	0.64604	0.611119	0.68503		57	0.544539	0.548235	0.560528	0.603994
58	0.550113	0.548909	0.532386	0.54415		58	0.535651	0.549224	0.512201	0.561507		58	0.633996	0.734579	0.696978	0.657956		58	0.781999	0.638957	0.60252	0.67088		58	0.557287	0.557558	0.568485	0.622041
59	0.543025	0.55579	0.538276	0.546415		59	0.544901	0.566376	0.509178	0.584612		59	0.646379	0.765339	0.707876	0.648652		59	0.750514	0.645708	0.60278	0.655248		59	0.575292	0.559433	0.560641	0.609679
60	0.549174	0.562328	0.539104	0.546447		60	0.53961	0.556598	0.506372	0.597889		60	0.649179	0.75177	0.724202	0.647911		60	0.717049	0.664121	0.609281	0.667916		60	0.597674	0.559946	0.573995	0.59291

## Sheet: R&3Q(WT) GST-PX
Replicate1						Replicate2						Replicate3						Replicate4						Replicate5
0	0.0186923	0.0329686	0.0190915	0.0341267		0	0.0163166	0.0237086	-0.0238434	0.0223553		0	0.0137641	0.0357734	0.0401218	-0.0142199		0	-0.0357685	-0.05975	-0.0102181	-0.0254347		0	-0.0120022	0.0559124	-0.0054846	0.00151815
1	0.0073736	0.020912	0.0435556	0.0681767		1	0.0145839	0.0264771	-0.0171842	0.044702		1	-0.0286974	0.0347458	0.0178209	0.00562229		1	-0.0597847	-0.0498601	-0.0155882	0.00128684		1	-0.0120022	0.0559124	-0.0054846	0.00151815
2	0.00705843	0.0214324	0.0712283	0.101369		2	0.0158791	0.0142291	-0.00422314	0.0737214		2	-0.0261736	0.0362108	0.0415939	0.0380042		2	-0.0600739	-0.0576245	0.0189151	0.0359261		2	-0.0123551	0.020173	0.00383681	0.0183194
3	0.00790876	0.0221257	0.0958259	0.134089		3	0.0119192	0.0163525	0.0747484	0.0952462		3	-0.0203857	0.037639	0.0578026	0.0626293		3	-0.0608113	-0.0533563	0.0484272	0.0732835		3	-0.0114583	0.0167679	0.0174467	0.0530739
4	0.00807808	0.0237535	0.11711	0.158238		4	0.0134888	0.0173437	0.0896746	0.121229		4	-0.0219046	0.0363368	0.0774692	0.0889941		4	-0.0574178	-0.0546185	0.0739111	0.0986864		4	-0.012899	0.018556	0.0351608	0.0789681
5	0.0069781	0.0230515	0.137664	0.183587		5	0.014574	0.0179406	0.0987611	0.14007		5	-0.0267455	0.0322758	0.0918307	0.10963		5	-0.0561844	-0.0573455	0.0943039	0.134137		5	-0.00869063	0.019899	0.0580494	0.105565
6	0.00657765	0.0255987	0.150321	0.207291		6	0.0122677	0.0168728	0.111139	0.158838		6	-0.0186631	0.0355328	0.10813	0.139627		6	-0.056371	-0.0549453	0.106241	0.153477		6	-0.0079222	0.0252567	0.067312	0.127461
7	0.0084019	0.0250265	0.16457	0.226704		7	0.014328	0.0189467	0.118321	0.177221		7	-0.0188938	0.0314562	0.124191	0.154906		7	-0.0560586	-0.05772	0.12704	0.175673		7	-0.00854764	0.0204149	0.0792501	0.149884
8	0.00722405	0.025731	0.176541	0.238776		8	0.013558	0.0226025	0.12771	0.192145		8	-0.0194713	0.0327103	0.137762	0.179203		8	-0.0552142	-0.0513624	0.14098	0.196767		8	-0.0060352	0.0200567	0.0869598	0.163723
9	0.00938199	0.0262117	0.184245	0.253148		9	0.0139807	0.0188095	0.128364	0.197182		9	-0.0187551	0.0363637	0.141728	0.191918		9	-0.0601071	-0.0542628	0.145598	0.205996		9	-0.00749054	0.0243159	0.0974385	0.174647
10	0.0102941	0.0267654	0.193952	0.262544		10	0.0155219	0.0189244	0.134595	0.211674		10	-0.0241566	0.0290089	0.147073	0.20839		10	-0.054594	-0.0562307	0.158737	0.224181		10	-0.00644948	0.0238642	0.100526	0.189303
11	0.00867133	0.0273117	0.202088	0.277585		11	0.0140413	0.0228781	0.141782	0.221524		11	-0.0178351	0.0286224	0.160179	0.22445		11	-0.0640067	-0.0563001	0.167706	0.238303		11	-0.00491262	0.0237613	0.107299	0.19986
12	0.010393	0.0286725	0.202705	0.284497		12	0.0140944	0.0230499	0.145429	0.231608		12	-0.0154981	0.0320196	0.173834	0.237093		12	-0.0542368	-0.0540662	0.178365	0.253265		12	-0.0046146	0.0220667	0.108826	0.208936
13	0.0107255	0.0269508	0.212179	0.288453		13	0.0133294	0.0224221	0.147666	0.237924		13	-0.0168541	0.0340069	0.180271	0.249185		13	-0.0587003	-0.0531712	0.182629	0.25676		13	-0.00526409	0.0251498	0.114212	0.222321
14	0.0105833	0.0285798	0.218679	0.301823		14	0.0160089	0.0253611	0.151395	0.245313		14	-0.0172151	0.0365491	0.184586	0.25382		14	-0.0538059	-0.0531336	0.188763	0.271765		14	-0.00491663	0.0265249	0.116558	0.232001
15	0.00810033	0.0296217	0.219852	0.304195		15	0.0160509	0.0243847	0.155388	0.251391		15	-0.0124605	0.039172	0.195132	0.268117		15	-0.0547617	-0.0520449	0.190029	0.279429		15	-0.00587216	0.0262964	0.121276	0.238356
16	0.00877391	0.0310208	0.225194	0.31133		16	0.0170532	0.0249124	0.158777	0.261239		16	-0.0158095	0.0352087	0.198849	0.278007		16	-0.0578776	-0.051426	0.199853	0.292783		16	-0.00672211	0.02583	0.121527	0.245242
17	0.0119552	0.0320664	0.230073	0.312749		17	0.0167084	0.0265809	0.161415	0.261231		17	-0.013767	0.0343636	0.21035	0.285178		17	-0.0530006	-0.0471028	0.206037	0.307012		17	-0.00332764	0.0289986	0.123533	0.24942
18	0.0119441	0.0334	0.229724	0.314498		18	0.0186055	0.0273793	0.161391	0.264703		18	-0.0109487	0.0380524	0.204872	0.296852		18	-0.0518525	-0.0490822	0.207393	0.309578		18	-0.00396778	0.0305689	0.120633	0.252642
19	0.0130231	0.0338832	0.228868	0.309271		19	0.016214	0.0334316	0.162625	0.270099		19	-0.00783893	0.0382024	0.213099	0.302642		19	-0.051173	-0.052574	0.213211	0.322156		19	-0.00412949	0.0326884	0.126972	0.260064
20	0.0131541	0.0354986	0.230355	0.3154		20	0.0190851	0.0338667	0.167444	0.274199		20	-0.00597899	0.0411707	0.217121	0.313416		20	-0.0511715	-0.0526912	0.217886	0.331414		20	-0.00291069	0.0273909	0.124653	0.259648
21	0.0129477	0.0400357	0.225238	0.309769		21	0.0227471	0.035482	0.172821	0.273853		21	-0.0069585	0.0432613	0.224542	0.324642		21	-0.0539925	-0.0439001	0.224074	0.340919		21	-0.00187765	0.0320082	0.12741	0.261673
22	0.0160437	0.0402334	0.229359	0.310052		22	0.0228719	0.0334675	0.171468	0.274906		22	-0.00665417	0.0456167	0.226546	0.33629		22	-0.0525885	-0.0468613	0.227673	0.349616		22	-0.000382211	0.0346062	0.132793	0.269595
23	0.0120022	0.0408761	0.225022	0.311183		23	0.0232983	0.0359529	0.17168	0.275567		23	-0.00722886	0.0444178	0.233377	0.343086		23	-0.0485154	-0.0440794	0.235479	0.362592		23	-0.000346129	0.0409447	0.130556	0.27315
24	0.0155777	0.0432195	0.224309	0.309057		24	0.025172	0.0370504	0.173726	0.279089		24	-0.000525143	0.0490804	0.194118	0.341612		24	-0.0479327	-0.0432929	0.237621	0.355792		24	-0.000555944	0.039909	0.127096	0.267274
25	0.0139611	0.0401778	0.223373	0.308255		25	0.0241425	0.0366908	0.178357	0.274639		25	-0.0109629	0.0479267	0.199011	0.354799		25	-0.0483101	-0.0480759	0.23687	0.363257		25	0.000388893	0.044128	0.128609	0.268671
26	0.0132332	0.0454899	0.218946	0.307429		26	0.0241103	0.0414775	0.175881	0.27566		26	-0.00440639	0.0539652	0.206955	0.356722		26	-0.0526969	-0.0378664	0.244648	0.372972		26	0.00260064	0.0487413	0.127907	0.270457
27	0.0127957	0.0504583	0.219311	0.307605		27	0.0286635	0.0440865	0.184959	0.27422		27	-0.00162639	0.0473903	0.205457	0.360093		27	-0.0487511	-0.03327	0.248751	0.382376		27	0.0006094	0.0421903	0.134525	0.276081
28	0.0151934	0.0448175	0.219109	0.310519		28	0.0296262	0.0418075	0.189413	0.273237		28	-0.00274745	0.0521689	0.214808	0.3789		28	-0.0421998	-0.0418976	0.254217	0.409388		28	0.0048017	0.0427115	0.132344	0.275325
29	0.0188925	0.0481706	0.218641	0.304567		29	0.0258134	0.0404393	0.17222	0.275992		29	-0.0029442	0.0472133	0.21148	0.379156		29	-0.0447648	-0.0384231	0.249058	0.394115		29	0.00289465	0.0507085	0.135485	0.276309
30	0.0150055	0.0463711	0.212184	0.304183		30	0.0315098	0.0435217	0.184171	0.275505		30	0.00423229	0.0573454	0.206565	0.394572		30	-0.0494596	-0.0408002	0.262697	0.415513		30	0.00406534	0.0588699	0.13242	0.275343
31	0.034118	0.0558038	0.298825	0.414544		31	0.0299266	0.0530444	0.268858	0.418852		31	0.00367176	0.0173977	0.293106	0.430646		31	-0.0427579	-0.033938	0.315706	0.421388		31	0.00447829	0.0239417	0.271067	0.419945
32	0.0330316	0.0548929	0.343779	0.405269		32	0.0248914	0.0530494	0.287811	0.430022		32	0.00323437	0.0164153	0.316255	0.480083		32	-0.0370351	-0.0347158	0.329448	0.459334		32	0.0134028	0.0357622	0.305681	0.402153
33	0.0304251	0.0496612	0.360979	0.445068		33	0.0407989	0.052623	0.304946	0.447303		33	0.0158435	0.0121561	0.318217	0.46443		33	-0.0358089	-0.0308582	0.355286	0.470765		33	0.00423373	0.0390711	0.268576	0.409507
34	0.0303237	0.0511134	0.364326	0.418157		34	0.0395816	0.0520112	0.308217	0.453265		34	-0.00655792	0.0146276	0.316835	0.464658		34	-0.0424514	-0.0324198	0.362904	0.483541		34	0.0155156	0.0382586	0.31177	0.382664
35	0.0310838	0.0525594	0.337634	0.40875		35	0.0354635	0.0572144	0.309019	0.468113		35	0.0215719	0.0126148	0.33005	0.464371		35	-0.0408985	-0.0275298	0.376397	0.48755		35	0.0138906	0.0351033	0.263818	0.392471
36	0.0308477	0.0525681	0.335651	0.384437		36	0.0258035	0.055981	0.29859	0.438116		36	0.0153749	0.019334	0.262737	0.478163		36	-0.0328159	-0.028098	0.380253	0.490868		36	0.00571713	0.034804	0.275139	0.429239
37	0.0305684	0.0527387	0.368958	0.388685		37	0.0292814	0.0569981	0.307627	0.453803		37	0.0294675	0.022458	0.26772	0.470064		37	-0.0370712	-0.0232991	0.381996	0.497757		37	0.00759211	0.0359974	0.299423	0.390043
38	0.0299937	0.0533875	0.377136	0.375213		38	0.0320808	0.0563456	0.311371	0.478751		38	-0.00707882	0.0230851	0.269444	0.47636		38	-0.0429271	-0.0227684	0.375275	0.489525		38	-0.000327419	0.0315217	0.301693	0.384358
39	0.0333777	0.0535346	0.35956	0.418539		39	0.0387016	0.0594601	0.314574	0.471804		39	0.0151287	0.0229803	0.28066	0.463281		39	-0.0260246	-0.0211707	0.379661	0.492914		39	0.00878284	0.0355096	0.227715	0.424068
40	0.0282659	0.0543169	0.377838	0.418928		40	0.0313985	0.0578757	0.318372	0.44451		40	0.012946	0.0132333	0.287335	0.468765		40	-0.0315016	-0.0270989	0.382443	0.489281		40	0.0076616	0.030482	0.205389	0.398923
41	0.0309614	0.0533925	0.379692	0.40462		41	0.0180939	0.0592154	0.312934	0.469548		41	0.0186645	0.0165059	0.286328	0.482396		41	-0.0289858	-0.0238905	0.384241	0.488849		41	0.0179132	0.0388827	0.211291	0.373008
42	0.0301519	0.0567938	0.39513	0.386465		42	0.0528937	0.0555991	0.316377	0.406042		42	0.00654377	0.0159482	0.278711	0.476898		42	-0.0401871	-0.0165974	0.388595	0.504883		42	0.0209388	0.0362312	0.212931	0.377251
43	0.0337262	0.0587107	0.430752	0.379791		43	0.0207647	0.0619727	0.296723	0.452321		43	0.0408309	0.0170834	0.299473	0.47439		43	-0.0469004	-0.021752	0.390917	0.488243		43	0.0070669	0.0371253	0.204265	0.347788
44	0.0317994	0.056774	0.391768	0.384646		44	0.0523363	0.0614079	0.311862	0.465863		44	0.0477003	0.0190878	0.283294	0.476746		44	-0.0298924	-0.0179768	0.379891	0.494833		44	0.0196064	0.0359372	0.203689	0.392653
45	0.0331058	0.0625767	0.42097	0.412018		45	0.0249359	0.0615673	0.311736	0.43294		45	0.024962	0.0254489	0.289467	0.492547		45	-0.0181112	-0.0166162	0.392947	0.512398		45	0.0244041	0.0370732	0.213921	0.349832
46	0.0253787	0.0666442	0.418892	0.40999		46	0.0262559	0.0635683	0.306	0.439408		46	0.00899255	0.0317818	0.30432	0.477819		46	-0.0197552	-0.012131	0.389494	0.512873		46	0.0152243	0.0370371	0.200497	0.376675
47	0.030236	0.0577603	0.391893	0.377931		47	0.0225654	0.0594527	0.312589	0.406796		47	0.0421289	0.027868	0.293998	0.482081		47	-0.0524107	-0.0176963	0.390897	0.49645		47	0.0238655	0.0409862	0.191305	0.369489
48	0.0334926	0.0556666	0.39866	0.412904		48	0.0230697	0.0630838	0.32716	0.388683		48	0.0307258	0.0411041	0.292499	0.476782		48	-0.0366273	-0.0131388	0.386539	0.518949		48	0.0145521	0.0407469	0.191487	0.329879
49	0.03471	0.0614878	0.385538	0.352123		49	0.0411364	0.0637994	0.298314	0.437018		49	0.0210128	0.0300478	0.303374	0.481978		49	-0.0159279	-0.0125561	0.39583	0.512671		49	0.0269994	0.0413657	0.192298	0.37134
50	0.0303954	0.0595017	0.393831	0.425941		50	0.0529851	0.0590757	0.298801	0.412355		50	0.0125709	0.0250851	0.302103	0.478492		50	0.000474252	-0.0243228	0.390661	0.505056		50	0.0426166	0.0417626	0.196246	0.340521
51	0.029854	0.0652463	0.337303	0.432129		51	0.0434982	0.0577755	0.29475	0.370348		51	0.0474455	0.0265204	0.297361	0.475231		51	-0.016515	-0.0213211	0.394779	0.526206		51	0.040763	0.0511508	0.193709	0.378706
52	0.0300011	0.0717993	0.365295	0.401337		52	0.0543088	0.0604303	0.296507	0.352774		52	0.0711095	0.0310401	0.298202	0.46974		52	-0.0220137	-0.0219284	0.412678	0.507853		52	0.0536098	0.0461514	0.196236	0.352174
53	0.0284723	0.0639239	0.320677	0.380112		53	0.0372432	0.0784315	0.285617	0.358157		53	0.0125553	0.0228374	0.306158	0.46666		53	-0.0416865	-0.00914237	0.407172	0.526815		53	0.0578663	0.0466859	0.224011	0.340222
54	0.0294598	0.0698452	0.346178	0.436562		54	-0.00448021	0.0660154	0.301453	0.365159		54	-0.017644	0.0392003	0.329678	0.483815		54	-0.0362919	-0.00873174	0.381576	0.53906		54	0.0350151	0.0508448	0.200462	0.379179
55	0.0273846	0.069498	0.354462	0.373784		55	0.014506	0.0643074	0.307276	0.360683		55	-0.0270994	0.0335143	0.309774	0.477283		55	-0.0102499	-0.0141264	0.411042	0.503602		55	0.0138385	0.0547271	0.208371	0.358447
56	0.0433567	0.0671274	0.317054	0.436466		56	0.0202159	0.0638563	0.313364	0.379571		56	0.0469274	0.043996	0.314095	0.451436		56	-0.00433044	-0.0168013	0.429042	0.531432		56	0.0272038	0.0450435	0.20648	0.372691
57	0.0277925	0.0702136	0.374331	0.433426		57	0.0949928	0.0713262	0.304442	0.413876		57	0.03584	0.0406696	0.337826	0.52227		57	-0.0438987	-0.0165005	0.411525	0.530359		57	0.00826699	0.0623245	0.19328	0.360927
58	0.0210085	0.0857839	0.323728	0.362107		58	0.0399758	0.0768903	0.300482	0.402873		58	0.0685673	0.0466443	0.322081	0.501445		58	-0.028338	-0.0141321	0.398924	0.502986		58	0.0257632	0.0717194	0.182987	0.355034
59	0.0244864	0.0888144	0.358696	0.432095		59	0.0821627	0.0739636	0.303429	0.362047		59	0.0551004	0.0476026	0.312548	0.498669		59	-0.00798132	-0.00175531	0.435008	0.479732		59	0.0545867	0.0437405	0.205167	0.365518
60	0.0336274	0.0753489	0.380855	0.395092		60	0.0473419	0.0748461	0.293077	0.39344		60	0.0416378	0.0598748	0.355287	0.47745		60	-0.0343197	-0.024142	0.40063	0.55827		60	0.0725413	0.0296869	0.198066	0.390962

## Sheet: R&3Q(3D) GST-PX
Replicate1						Replicate2						Replicate3						Replicate4						Replicate5
0	0.00405882	0.00282906	0.00467802	0.0104795		0	-0.0374657	0.0336566	0.0486186	0.00713744		0	0.0393235	0.0211869	-0.00164054	0.0129686		0	-0.0318588	-0.0566269	-0.0470681	0.00362051		0	-0.02525	0.0102409	-0.0152003	-0.00310981
1	-0.00367568	-0.000325051	0.00462858	0.0132356		1	-0.0434525	0.0346688	0.02205	0.00894188		1	-0.00310273	-0.00391522	0.00285644	0.0127959		1	-0.0450482	-0.0704698	-0.0477679	0.00481337		1	-0.0222324	-0.00836455	-0.0144652	-0.00389027
2	-0.00182424	0.00187368	0.00646395	0.0117426		2	-0.00144232	0.0326246	0.0213839	0.00690632		2	0.00675609	0.00108426	0.0137854	0.0191104		2	-0.044947	-0.0709889	-0.0440606	0.00350629		2	-0.0227509	-0.00254585	-0.0133199	-0.00443953
3	-0.00168458	0.00543936	0.00691136	0.0156877		3	-0.00327766	0.0324948	0.0203457	0.00714609		3	-0.00195761	-0.00564777	0.0103104	0.0112715		3	-0.0476493	-0.064588	-0.0394468	0.00309421		3	-0.0210764	-0.0048017	-0.0130941	-0.000231198
4	0	0.0029576	0.00839695	0.0178333		4	0	0.0342103	0.0209439	0.0084401		4	0	0.000965358	0.0102127	0.0122595		4	-0.0671992	-0.0705494	-0.0605019	0		4	-0.0213317	-0.00285589	-0.0106578	0
5	-0.000509206	0.00380051	0.00612407	0.0145235		5	0.000311452	0.0313565	0.0228991	0.0112975		5	-0.00223221	-0.0004572	0.00392371	0.0135419		5	-0.0688967	-0.0681521	-0.0617164	-0.0259349		5	-0.0196558	-0.0035388	-0.0133253	0.00119474
6	-0.000475836	0.00293288	0.0090211	0.0138252		6	0.000792225	0.0335787	0.0239892	0.0112061		6	0.000523728	-0.00335893	0.00625925	0.0189377		6	-0.0638361	-0.0656232	-0.0593538	-0.0236591		6	-0.0204924	-0.00146069	-0.00963547	0.00231465
7	-0.000543812	0.00545048	0.0099394	0.0178321		7	-0.000163141	0.035063	0.0212467	0.0110306		7	-0.00247992	-0.00106727	0.00481688	0.013314		7	-0.0683097	-0.0669693	-0.0605857	-0.0233627		7	-0.0187631	-0.000156359	-0.0110614	0.00424709
8	-0.000819426	0.0043542	0.00785685	0.0145148		8	0.00088739	0.0351063	0.0204977	0.0146753		8	-0.00163063	0.00431721	0.00725575	0.0126756		8	-0.0682446	-0.06333	-0.0603529	-0.026454		8	-0.0179559	-0.0012923	-0.011036	0.00184557
9	-0.000294153	0.00562228	0.00910144	0.0178964		9	0.00254599	0.0332215	0.0219722	0.0105449		9	-0.00154146	0.00338724	0.00446301	0.0110351		9	-0.0642872	-0.0633532	-0.0588839	-0.0305864		9	-0.0163162	0.000343456	-0.00799036	0.00239216
10	0.000987513	0.004065	0.0099839	0.0165863		10	-0.00320598	0.0328334	0.0228571	0.00903457		10	-0.00607099	0.000934217	0.00691321	0.009839		10	-0.0691367	-0.0657201	-0.0581537	-0.0289511		10	-0.0195195	0.00148074	-0.0083151	0.00296281
11	0.00156346	0.0056952	0.00638114	0.0171227		11	-0.00242735	0.0342931	0.0253574	0.0109811		11	-0.00176369	0.00395768	0.00464419	0.015065		11	-0.0672744	-0.0668233	-0.0632115	-0.0298201		11	-0.0180882	0.000918109	-0.00901538	0.00339313
12	0.00331478	0.00352242	0.00823752	0.0142256		12	0.000486952	0.0343734	0.0212665	0.0122801		12	-0.000634135	0.00683535	0.00416717	0.00981636		12	-0.0679728	-0.0638607	-0.0580149	-0.0251947		12	-0.018707	0.00180682	-0.00624769	0.00209548
13	0.00228772	0.0028476	0.00921144	0.0167717		13	-0.00106042	0.0354981	0.0246961	0.0100616		13	0.000798331	0.00649847	0.00765067	0.0122425		13	-0.0672209	-0.0637725	-0.0597804	-0.0267316		13	-0.0164511	0.0021623	-0.00660584	0.00256857
14	0.00379309	0.00540475	0.00896796	0.0150895		14	-0.000205163	0.0337913	0.0234911	0.0106153		14	0.000598748	0.00304045	0.0062451	0.0111809		14	-0.0688519	-0.0672166	-0.0584993	-0.025199		14	-0.0169149	0.00475492	-0.00637464	0.00266345
15	0.00118526	0.00561486	0.00891481	0.0172685		15	0.00033617	0.0367328	0.0253475	0.0118092		15	0.00155137	0.00997206	0.00967339	0.0119396		15	-0.0679887	-0.0624206	-0.0594695	-0.0254867		15	-0.0174401	0.00550732	-0.00397045	0.00511041
16	0.00122976	0.00828325	0.00966502	0.0181571		16	0.00177725	0.0361791	0.0268195	0.0137397		16	1.41548e-06	0.00930537	0.00553877	0.0131498		16	-0.0678268	-0.0652155	-0.0552591	-0.0286966		16	-0.0150385	0.00839261	-0.00419497	0.00679428
17	0.00301321	0.00692866	0.013049	0.0180991		17	0.00292666	0.0387337	0.0253364	0.0135148		17	0.00116211	0.0102905	0.00350473	0.0137018		17	-0.0694404	-0.0606204	-0.0593018	-0.0277365		17	-0.0191533	0.00548594	-0.00489525	0.00390363
18	0.00327647	0.00694349	0.00955503	0.0200086		18	0.0013039	0.0411252	0.0261916	0.0164526		18	0.00130932	0.00890054	0.00912135	0.0142157		18	-0.0684066	-0.0622152	-0.0561975	-0.0288614		18	-0.0158791	0.00326617	-0.00526276	0.00234806
19	0.0038796	0.00866021	0.0116227	0.0176714		19	0.00483245	0.040684	0.0271321	0.0160867		19	0.00208925	0.0145596	0.00365902	0.012963		19	-0.0699363	-0.0601982	-0.0539231	-0.0225834		19	-0.0169416	0.00533359	-0.00563294	0.00722192
20	0.00190829	0.00863178	0.013494	0.020477		20	0.000177972	0.041543	0.0286326	0.0159977		20	0.00512404	0.0169759	0.00872219	0.0165286		20	-0.0682591	-0.0619362	-0.053965	-0.0282368		20	-0.0160662	0.00726335	-0.000720321	0.00731013
21	0.00372882	0.00773202	0.0102855	0.0195624		21	0.00519457	0.0422561	0.0322451	0.0138584		21	0.00818431	0.0198903	0.00458757	0.013624		21	-0.0726618	-0.0583851	-0.0542441	-0.0264251		21	-0.0140723	0.00413483	0.000138986	0.00713907
22	0.00448645	0.00985907	0.0133988	0.0222011		22	0.00500053	0.0473271	0.0290243	0.0156987		22	0.00651404	0.0159878	0.00919213	0.0112177		22	-0.0661466	-0.0549121	-0.0511383	-0.0226933		22	-0.01566	0.00790215	-0.00224783	0.00790215
23	0.00214188	0.00683349	0.0155085	0.0204585		23	0.00357675	0.0503662	0.035288	0.0185586		23	0.00722461	0.0215266	0.00957855	0.0116919		23	-0.0668522	-0.0530729	-0.0499946	-0.0249532		23	-0.0106618	0.0105188	-0.00233336	0.0113741
24	0.00300209	0.0124755	0.013536	0.0207847		24	0.00663936	0.0501413	0.0354894	0.0192841		24	0.00842211	0.0165003	0.0125397	0.0206802		24	-0.0717769	-0.0511441	-0.0542874	-0.0258294		24	-0.0146082	0.00896192	0.000633455	0.0141926
25	0.00239277	0.00963907	0.0114374	0.0226399		25	0.00424168	0.0455127	0.0394258	0.0234849		25	0.0102792	0.0194034	0.0106303	0.0203461		25	-0.0710034	-0.0580467	-0.0526796	-0.023062		25	-0.0117483	0.00835119	0.000232534	0.0128281
26	0.00105055	0.0077555	0.0150599	0.0205647		26	0.00763675	0.0506702	0.0391725	0.0221217		26	0.00861037	0.023296	0.0139368	0.0152546		26	-0.0703397	-0.0586309	-0.0508014	-0.0206762		26	-0.0106124	0.0126023	0.00228124	0.012057
27	0.00276232	0.00866762	0.0134618	0.0215313		27	0.00758608	0.047222	0.0383271	0.0237482		27	0.00703635	0.0226151	0.0166998	0.018104		27	-0.0690211	-0.0464536	-0.0472763	-0.0198593		27	-0.013193	0.0149918	0.00287594	0.0155344
28	0.00313434	0.0117204	0.0186107	0.0194376		28	0.0075836	0.0543595	0.03829	0.0269122		28	0.0162002	0.0323324	0.0137571	0.0194459		28	-0.0654193	-0.0474686	-0.0466849	-0.0216233		28	-0.0112325	0.0074745	0.0023347	0.0146376
29	-0.000196514	0.0128933	0.0130676	0.0225138		29	0.0116967	0.0469192	0.0469303	0.029379		29	0.0103613	0.0323168	0.0145681	0.0210963		29	-0.0729973	-0.0530064	-0.0533331	-0.0242649		29	-0.0155891	0.0184277	-0.00032341	0.0201463
30	0.00291928	0.00842538	0.00907425	0.0293696		30	0.00641319	0.0499188	0.0461171	0.022448		30	0.0125157	0.0285715	0.0130748	0.0233724		30	-0.0747772	-0.053242	-0.0478691	-0.0183223		30	-0.0112245	0.0606447	0.0145695	0.0303738
31	0.0500035	0.0333196	0.0630686	0.0834677		31	0.0103236	0.0590387	0.0436675	0.112895		31	0.0154316	0.0518674	0.0123628	0.120152		31	-0.0716294	-0.0553183	-0.0141712	0.0110249		31	-0.010738	0.0297082	0.0445036	0.114057
32	0.038555	0.0328524	0.131777	0.192597		32	0.00721036	0.0562739	0.0756049	0.18791		32	0.0151584	0.0663153	0.06426	0.218024		32	-0.0655654	-0.0600233	0.0453056	0.112003		32	-0.00805183	0.00324211	0.0642556	0.154965
33	0.0370719	0.0346025	0.162309	0.235828		33	0.0109638	0.0562158	0.0916422	0.219843		33	0.0198776	0.0117626	0.0875149	0.120951		33	-0.0703961	-0.0536787	0.067098	0.15168		33	-0.00739432	0.00510239	0.0730037	0.17287
34	0.0346198	0.0373933	0.170851	0.253602		34	0.0123889	0.055122	0.103015	0.231073		34	0.00920204	0.00953184	0.0995904	0.148944		34	-0.0713359	-0.0542961	0.0748769	0.13772		34	-0.00839529	0.00590557	0.0776357	0.183737
35	0.0331824	0.0389011	0.175703	0.261978		35	0.0151375	0.0542186	0.108358	0.231578		35	0.0160034	0.0102452	0.1159	0.161545		35	-0.0712738	-0.052	0.0892925	0.152647		35	-0.0124072	0.00526142	0.0815246	0.193591
36	0.0323185	0.03944	0.180357	0.263809		36	0.0121071	0.0566027	0.112733	0.241722		36	0.0119806	0.00772428	0.116074	0.172897		36	-0.0701142	-0.0514622	0.0913109	0.163063		36	-0.014516	0.0035829	0.0862207	0.191659
37	0.0285155	0.0368915	0.187913	0.263808		37	0.0168369	0.0585245	0.11409	0.246122		37	0.0133126	0.0116126	0.1129	0.184739		37	-0.0731476	-0.0496909	0.0994889	0.166512		37	-0.0150693	0.00672879	0.0862354	0.195575
38	0.0248127	0.0420095	0.193606	0.273956		38	0.0115583	0.0572441	0.116755	0.251075		38	0.0197389	0.0196313	0.112398	0.185469		38	-0.0750172	-0.0499743	0.0992836	0.173358		38	-0.00889777	0.00423506	0.0907298	0.200428
39	0.0240031	0.0403274	0.193204	0.272781		39	0.00596084	0.0583577	0.11818	0.253904		39	0.0149376	0.0134556	0.120408	0.186413		39	-0.0631912	-0.052496	0.0885565	0.179296		39	-0.00838059	0.00324746	0.0896005	0.20302
40	0.0214373	0.0420762	0.19547	0.277825		40	0.0024669	0.0577397	0.122038	0.251879		40	0.0197417	0.0165908	0.12136	0.189345		40	-0.0672195	-0.0503445	0.0892563	0.173854		40	-0.00639202	0.00334235	0.0963306	0.203804
41	0.0178321	0.0391829	0.201814	0.275284		41	-0.000179208	0.0592549	0.12154	0.2526		41	0.0190028	0.0124817	0.121741	0.18858		41	-0.067941	-0.0529485	0.0973432	0.173724		41	-0.00515584	0.00504893	0.0946735	0.211724
42	0.0139389	0.037544	0.201641	0.279086		42	0.0142217	0.0584825	0.12103	0.251064		42	0.0155759	0.0102297	0.12031	0.19119		42	-0.0545491	-0.0473631	0.10127	0.184854		42	0.00027129	0.00663925	0.0924791	0.205209
43	0.0110802	0.0321208	0.195147	0.279867		43	-0.000787281	0.0600311	0.125704	0.255586		43	0.0338993	0.0154486	0.123785	0.201092		43	-0.0537177	-0.0478084	0.09505	0.178398		43	-0.0129604	0.0089793	0.0998454	0.208137
44	0.0087047	0.0329402	0.195696	0.285557		44	0.00239892	0.061136	0.126199	0.257845		44	0.0060809	0.0175505	0.125312	0.202751		44	-0.0636048	-0.0499411	0.0938441	0.185499		44	-0.0104467	0.00495004	0.0972474	0.203124
45	0.0109702	0.0330391	0.200507	0.284289		45	-0.0051785	0.0598927	0.133439	0.255079		45	0.0280704	0.0165937	0.118677	0.212887		45	-0.0624726	-0.0471158	0.0937892	0.181751		45	-0.00680764	0.00813469	0.100583	0.208447
46	0.00582991	0.0286886	0.197825	0.290247		46	0.0206003	0.0640899	0.127819	0.255779		46	0.00707032	0.0180672	0.12607	0.211345		46	-0.0570346	-0.0484258	0.104495	0.182239		46	-0.0107353	0.00544852	0.103796	0.211411
47	0.00658136	0.0299467	0.200908	0.287379		47	0.00529221	0.0649575	0.126069	0.257068		47	0.0177077	0.0212959	0.134422	0.211249		47	-0.0608749	-0.0497054	0.0963123	0.187814		47	-0.00875077	0.00894589	0.105779	0.21372
48	0.00676799	0.0323012	0.199813	0.287391		48	-0.0123641	0.0632371	0.132525	0.26729		48	0.0106034	0.0174699	0.129279	0.209975		48	-0.0645388	-0.0469944	0.104318	0.180583		48	-0.0115666	0.0132304	0.106868	0.212435
49	0.00303052	0.0371189	0.198375	0.291876		49	-0.00720294	0.060366	0.132037	0.261508		49	0.0300351	0.017869	0.134564	0.229049		49	-0.0512727	-0.0450916	0.104266	0.191352		49	-0.00852893	0.0119875	0.105116	0.21269
50	0.00151897	0.0317364	0.196191	0.290378		50	0.0176551	0.0632939	0.130742	0.258905		50	0.0270215	0.0271362	0.124306	0.219654		50	-0.0565734	-0.042635	0.104184	0.183819		50	0.00240954	0.011473	0.107703	0.212014
51	-0.00395994	0.0320058	0.202762	0.292499		51	0.0203136	0.0664616	0.135056	0.269007		51	0.0353898	0.0218536	0.129999	0.205383		51	-0.0574539	-0.0431251	0.118495	0.18745		51	-0.0147967	0.0143463	0.110114	0.211689
52	0.00143863	0.0330378	0.200411	0.292094		52	-0.00151153	0.0679064	0.137323	0.268007		52	0.0299105	0.0242543	0.131422	0.226337		52	-0.0743564	-0.0345452	0.108919	0.195146		52	-0.015529	0.0126223	0.118866	0.209158
53	-0.00191694	0.0358768	0.194545	0.293006		53	0.00946962	0.0658337	0.134657	0.261155		53	0.0316218	0.0230596	0.137123	0.222955		53	-0.0614417	-0.0339481	0.11899	0.204057		53	-0.020042	0.0144746	0.114198	0.221852
54	0.000222469	0.033311	0.210296	0.300237		54	0.028174	0.0653517	0.140269	0.265783		54	0.0335908	0.0251035	0.139579	0.233326		54	-0.0559242	-0.0362268	0.127757	0.213126		54	-0.0305609	0.0159166	0.106177	0.230003
55	-0.00127672	0.0319082	0.208105	0.296941		55	0.0272767	0.0657979	0.140047	0.258875		55	0.0290796	0.0293627	0.139265	0.222329		55	-0.0541775	-0.0364625	0.116775	0.187328		55	-0.0183408	0.0141659	0.101716	0.223971
56	-0.00484982	0.0390951	0.204488	0.298706		56	-0.00939546	0.0699036	0.130362	0.265112		56	0.0309523	0.0278949	0.136524	0.232837		56	-0.0387108	-0.033977	0.119212	0.212238		56	-0.0201436	0.0130446	0.104896	0.217258
57	-0.00214188	0.0338498	0.198839	0.300544		57	0.00106413	0.0670178	0.131922	0.263454		57	0.0433505	0.0280761	0.159249	0.233741		57	-0.0641195	-0.02886	0.117816	0.206767		57	-0.0188366	0.022052	0.108309	0.233132
58	-0.0101334	0.0320194	0.19855	0.30034		58	0.0454201	0.0726128	0.141617	0.273594		58	0.0172745	0.0215167	0.141261	0.232259		58	-0.0767566	-0.0392386	0.120884	0.201653		58	-0.0024082	0.0274511	0.120843	0.229896
59	-0.0146347	0.0270275	0.207216	0.297413		59	0.0272669	0.0672625	0.139076	0.256572		59	0.0286974	0.0354691	0.12926	0.219562		59	-0.0692495	-0.0363584	0.110608	0.219105		59	-0.0186482	0.0154675	0.110329	0.231333
60	-0.00775797	0.0333443	0.189578	0.288255		60	0.0367216	0.0747361	0.141229	0.272781		60	0.0434326	0.0286677	0.159891	0.239505		60	-0.0516733	-0.0198347	0.115806	0.201069		60	-0.0155477	0.0129431	0.121283	0.246048

## Sheet: Sheet4
3Q(WT) HOPS	Condition D	Condition B	Condition C	Condition A			Condition D	Condition B	Condition C	Condition A			Condition D	Condition B	Condition C	Condition A			Condition D	Condition B	Condition C	Condition A			Condition D	Condition B	Condition C	Condition A
0	0.0642366	0.0414558	0.0891568	0.11521		0	0.0364559	0.0400129	0.0926038	0.0772499		0	-0.00514952	-0.00718215	0.0440681	0.0550834		0	-0.00429719	-0.0125127	0.0703079	0.10074		0	0.0487159	0.0453281	0.101127	0.126356
5	0.335296	0.177945	0.291582	0.322184		5	0.287734	0.180662	0.30654	0.253289		5	0.277993	0.161008	0.281116	0.256031		5	0.36223	0.201966	0.35539	0.375162		5	0.328737	0.20291	0.312574	0.329218
30	0.48844	0.336576	0.462946	0.481931		30	0.465618	0.349044	0.461172	0.44649		30	0.541761	0.385278	0.540944	0.527302		30	0.579594	0.390112	0.555442	0.565579		30	0.48997	0.423477	0.458924	0.577404
32	0.498609	0.378993	0.50071	0.531276		32	0.480188	0.41355	0.471587	0.487585		32	0.573935	0.46512	0.576168	0.536463		32	0.602598	0.419294	0.603574	0.660521		32	0.483591	0.486703	0.467704	0.571826
35	0.498082	0.423156	0.501925	0.523566		35	0.474428	0.449751	0.510366	0.515914		35	0.571183	0.523895	0.605745	0.567266		35	0.607075	0.495477	0.626914	0.663392		35	0.486646	0.529919	0.490019	0.565003
	Condition D	Condition B	Condition C	Condition A			Condition D	Condition B	Condition C	Condition A			Condition D	Condition B	Condition C	Condition A			Condition D	Condition B	Condition C	Condition A			Condition D	Condition B	Condition C	Condition A
initial fusion rate (5min-0min)/5	0.0542119	0.0272979	0.0404851	0.0413947			0.0502557	0.0281298	0.0427873	0.0352079			0.0566286	0.033638	0.0474095	0.0401894			0.0733055	0.0428958	0.0570164	0.0548846			0.0560041	0.0315164	0.0422894	0.0405724
Sudden fusion rate (32min-0min)/2	0.00508464	0.0212081	0.018882	0.0246724			0.00485675	0.0215021	0.0034717	0.0136985			0.0107246	0.0266139	0.0117414	0.00305366			0.00766804	0.00972747	0.0160441	0.0316472			-0.00212622	0.0210755	0.00292672	-0.00185938
Sudden fusion rate (35min-0min)/5	0.00192856	0.017316	0.00779579	0.008327			0.00176193	0.0201415	0.00983866	0.0138848			0.00588443	0.0277233	0.0129601	0.00799293			0.00549612	0.021073	0.0142944	0.0195626			-0.000664727	0.0212884	0.00621909	-0.0024801
	Condition D	Condition B	Condition C	Condition A
	0.0580812	0.0326956	0.0459975	0.0424498
	0.00524157	0.0200254	0.0106132	0.0142425
	0.00288126	0.0215084	0.0102216	0.00945745
	0.00886587	0.00625111	0.00666806	0.00736234
	0.00475417	0.0062076	0.00723229	0.0141108
	0.00276546	0.00381798	0.00339626	0.00817991
3Q(3D) HOPS	Condition D	Condition B	Condition C	Condition A			Condition D	Condition B	Condition C	Condition A			Condition D	Condition B	Condition C	Condition A			Condition D	Condition B	Condition C	Condition A			Condition D	Condition B	Condition C	Condition A
0	0.0637051	0.006789	0.00775427	0.0115634		0	0.000821887	0.00597938	0.0126101	0.0141476		0	0.00615875	0.0138236	0.0034382	-0.0377452		0	0.0307396	-0.0765267	-0.0666267	-0.0547848		0	0.0356365	-0.0133587	0.0068063	-0.000109585
5	0.288224	0.0191175	0.0103534	0.0123655		5	0.20598	0.0101222	0.0124482	0.0144121		5	0.212822	0.00639089	-0.00019109	-0.0399661		5	0.336452	-0.0641744	-0.0644723	-0.0539679		5	0.23187	-0.00743709	0.000497142	0.00423239
30	0.489297	0.0652748	0.0119836	0.0131825		30	0.466812	0.0173091	0.00964141	0.0123678		30	0.549773	-0.000322729	-0.0213539	-0.0387955		30	0.569713	-0.00853654	-0.0662666	-0.0603472		30	0.477079	0.00500617	-0.00497008	0.00267548
32	0.506279	0.45884	0.408137	0.439437		32	0.477457	0.502933	0.434628	0.420906		32	0.563431	0.687294	0.579406	0.475318		32	0.593587	0.642723	0.496707	0.683252		32	0.490467	0.508854	0.516986	0.467355
35	0.509828	0.484907	0.43361	0.466806		35	0.48161	0.537321	0.464658	0.468988		35	0.57157	0.609775	0.637674	0.537165		35	0.581206	0.62289	0.533304	0.617235		35	0.494274	0.538159	0.525847	0.517616
	Condition D	Condition B	Condition C	Condition A			Condition D	Condition B	Condition C	Condition A			Condition D	Condition B	Condition C	Condition A			Condition D	Condition B	Condition C	Condition A			Condition D	Condition B	Condition C	Condition A
initial fusion rate (5min-0min)/5	0.0449038	0.00246569	0.000519835	0.000160425			0.0410315	0.000828561	-3.23811e-05	5.28974e-05			0.0413326	-0.00148654	-0.000725858	-0.000444178			0.0611424	0.00247045	0.000430876	0.000163386			0.0392467	0.00118432	-0.00126183	0.000868395
Sudden fusion rate (32min-0min)/2	0.00849088	0.196783	0.198077	0.213127			0.00354833	0.161875	0.141662	0.136179			0.00455266	0.229205	0.200253	0.171371			0.00795818	0.217087	0.187658	0.247866			0.0044627	0.167949	0.173985	0.154893
Sudden fusion rate (35min-0min)/5	0.00410603	0.0839265	0.0843252	0.0907247			0.00295953	0.104002	0.0910032	0.0913241			0.0043594	0.122019	0.131806	0.115192			0.00229868	0.126285	0.119914	0.135516			0.0034391	0.106631	0.106163	0.102988
	Condition D	Condition B	Condition C	Condition A
	0.0455314	0.0010925	-0.000213872	0.000160185
	0.00580255	0.19458	0.180327	0.184687
	0.00343255	0.108573	0.106642	0.107149
	0.00896484	0.00162126	0.000766047	0.000468598
	0.00225349	0.0295345	0.0239845	0.0453278
	0.000839951	0.0167828	0.0196989	0.0187543
3Q(WT) GST-PX	Condition D	Condition B	Condition C	Condition A			Condition D	Condition B	Condition C	Condition A			Condition D	Condition B	Condition C	Condition A			Condition D	Condition B	Condition C	Condition A			Condition D	Condition B	Condition C	Condition A
0	0.0186923	0.0329686	0.0190915	0.0341267		0	0.0163166	0.0237086	-0.0238434	0.0223553		0	0.0137641	0.0357734	0.0401218	-0.0142199		0	-0.0357685	-0.05975	-0.0102181	-0.0254347		0	-0.0120022	0.0559124	-0.0054846	0.00151815
5	0.0069781	0.0230515	0.137664	0.183587		5	0.014574	0.0179406	0.0987611	0.14007		5	-0.0267455	0.0322758	0.0918307	0.10963		5	-0.0561844	-0.0573455	0.0943039	0.134137		5	-0.00869063	0.019899	0.0580494	0.105565
30	0.0150055	0.0463711	0.212184	0.304183		30	0.0315098	0.0435217	0.184171	0.275505		30	0.00423229	0.0573454	0.206565	0.394572		30	-0.0494596	-0.0408002	0.262697	0.415513		30	0.00406534	0.0588699	0.13242	0.275343
32	0.0330316	0.0548929	0.343779	0.405269		32	0.0248914	0.0530494	0.287811	0.430022		32	0.00323437	0.0164153	0.316255	0.480083		32	-0.0370351	-0.0347158	0.329448	0.459334		32	0.0134028	0.0357622	0.305681	0.402153
35	0.0310838	0.0525594	0.337634	0.40875		35	0.0354635	0.0572144	0.309019	0.468113		35	0.0215719	0.0126148	0.33005	0.464371		35	-0.0408985	-0.0275298	0.376397	0.48755		35	0.0138906	0.0351033	0.263818	0.392471
	Condition D	Condition B	Condition C	Condition A			Condition D	Condition B	Condition C	Condition A			Condition D	Condition B	Condition C	Condition A			Condition D	Condition B	Condition C	Condition A			Condition D	Condition B	Condition C	Condition A
initial fusion rate (5min-0min)/5	-0.00234284	-0.00198343	0.0237144	0.0298921			-0.000348529	-0.00115361	0.0245209	0.023543			-0.00810193	-0.00069953	0.0103418	0.0247701			-0.0040832	0.000480903	0.0209044	0.0319143			0.000662322	-0.00720268	0.0127068	0.0208094
Sudden fusion rate (32min-0min)/2	0.00901307	0.00426089	0.0657976	0.050543			-0.00220612	0.0031759	0.0345468	0.0515057			-0.000332638	-0.0136433	0.0365633	0.0285035			0.00414151	0.0020281	0.0222503	0.0146069			0.00311248	-0.00770258	0.0577536	0.04227
Sudden fusion rate (35min-0min)/5	0.00321566	0.00123767	0.02509	0.0209135			0.000790741	0.00273855	0.0249698	0.0385216			0.00346793	-0.00894612	0.024697	0.0139597			0.00171222	0.00265408	0.0227401	0.0144074			0.00196505	-0.00475332	0.0262796	0.0234255
	Condition D	Condition B	Condition C	Condition A
	-0.00284283	-0.00211167	0.0184377	0.0261858
	0.00274566	-0.00237621	0.0433823	0.0374858
	0.00223032	-0.00141383	0.0247553	0.0222456
	0.00346245	0.00298196	0.00650617	0.00459474
	0.00434049	0.00789927	0.0178893	0.0157644
	0.00110835	0.00521316	0.00127924	0.00997708
3Q(3D) GST-PX	Condition D	Condition B	Condition C	Condition A			Condition D	Condition B	Condition C	Condition A			Condition D	Condition B	Condition C	Condition A			Condition D	Condition B	Condition C	Condition A			Condition D	Condition B	Condition C	Condition A
0	0.00405882	0.00282906	0.00467802	0.0104795		0	-0.0374657	0.0336566	0.0486186	0.00713744		0	0.0393235	0.0211869	-0.00164054	0.0129686		0	-0.0318588	-0.0566269	-0.0470681	0.00362051		0	-0.02525	0.0102409	-0.0152003	-0.00310981
5	-0.000509206	0.00380051	0.00612407	0.0145235		5	0.000311452	0.0313565	0.0228991	0.0112975		5	-0.00223221	-0.0004572	0.00392371	0.0135419		5	-0.0688967	-0.0681521	-0.0617164	-0.0259349		5	-0.0196558	-0.0035388	-0.0133253	0.00119474
30	0.00291928	0.00842538	0.00907425	0.0293696		30	0.00641319	0.0499188	0.0461171	0.022448		30	0.0125157	0.0285715	0.0130748	0.0233724		30	-0.0747772	-0.053242	-0.0478691	-0.0183223		30	-0.0155891	0.0184277	-0.00032341	0.0201463
32	0.038555	0.0328524	0.131777	0.192597		32	0.00721036	0.0562739	0.0756049	0.18791		32	0.0151584	0.0663153	0.06426	0.218024		32	-0.0655654	-0.0600233	0.0453056	0.112003		32	-0.00805183	0.00324211	0.0642556	0.154965
35	0.0331824	0.0389011	0.175703	0.261978		35	0.0151375	0.0542186	0.108358	0.231578		35	0.0160034	0.0102452	0.1159	0.161545		35	-0.0712738	-0.052	0.0892925	0.152647		35	-0.0124072	0.00526142	0.0815246	0.193591
	Condition D	Condition B	Condition C	Condition A			Condition D	Condition B	Condition C	Condition A			Condition D	Condition B	Condition C	Condition A			Condition D	Condition B	Condition C	Condition A			Condition D	Condition B	Condition C	Condition A
initial fusion rate (5min-0min)/5	-0.000913604	0.000194289	0.000289209	0.000808797			0.00755542	-0.000460009	-0.0051439	0.000832021			-0.00831113	-0.00432882	0.00111285	0.000114654			-0.00740759	-0.00230504	-0.00292966	-0.00591109			0.00111884	-0.00275593	0.000374995	0.000860911
Sudden fusion rate (32min-0min)/2	0.0178179	0.0122135	0.0613513	0.0816138			0.000265723	0.00211837	0.00982927	0.0551542			0.000880901	0.0125813	0.0170617	0.0648837			0.00307059	-0.00226041	0.0310582	0.0434418			0.00251244	-0.00506185	0.0215263	0.0449397
Sudden fusion rate (35min-0min)/5	0.00605263	0.00609514	0.0333258	0.0465216			0.00174487	0.000859953	0.0124482	0.041826			0.000697549	-0.00366524	0.0205649	0.0276344			0.000700679	0.000248404	0.0274323	0.0341939			0.000636395	-0.00263325	0.0163696	0.034689
	Condition D	Condition B	Condition C	Condition A
	-0.00159161	-0.0019311	-0.0012593	-0.000658942
	0.00490951	0.00391818	0.0281654	0.0580066
	0.00196642	0.000181002	0.0220282	0.036973
	0.00652786	0.00182007	0.00267283	0.00295257
	0.00730664	0.00815348	0.0200827	0.0157766
	0.00233063	0.00381301	0.008408	0.00732935
	Condition D	Condition B	Condition C	Condition A
	0.0580812	0.0326956	0.0459975	0.0424498		0.0455314	0.0010925	-0.000213872	0.000160185		-0.00284283	-0.00211167	0.0184377	0.0261858		-0.00159161	-0.0019311	-0.0012593	-0.000658942
	0.00524157	0.0200254	0.0106132	0.0142425		0.00580255	0.19458	0.180327	0.184687		0.00274566	-0.00237621	0.0433823	0.0374858		0.00490951	0.00391818	0.0281654	0.0580066
	0.00288126	0.0215084	0.0102216	0.00945745		0.00343255	0.108573	0.106642	0.107149		0.00223032	-0.00141383	0.0247553	0.0222456		0.00196642	0.000181002	0.0220282	0.036973
	0.00886587	0.00625111	0.00666806	0.00736234		0.00896484	0.00162126	0.000766047	0.000468598		0.00346245	0.00298196	0.00650617	0.00459474		0.00652786	0.00182007	0.00267283	0.00295257
	0.00475417	0.0062076	0.00723229	0.0141108		0.00225349	0.0295345	0.0239845	0.0453278		0.00434049	0.00789927	0.0178893	0.0157644		0.00730664	0.00815348	0.0200827	0.0157766
	0.00276546	0.00381798	0.00339626	0.00817991		0.000839951	0.0167828	0.0196989	0.0187543		0.00110835	0.00521316	0.00127924	0.00997708		0.00233063	0.00381301	0.008408	0.00732935
	Figure 1,B					Figure 1,C					Figure 1,D					Figure 1,E
	Condition A	Condition B	Condition C	Condition D		Condition A	Condition B	Condition C	Condition D		Condition A	Condition B	Condition C	Condition D		Condition A	Condition B	Condition C	Condition D
initial fusion rate (5min-0min)/5	0.0424498	0.0326956	0.0459975	0.0580812		0.000160185	0.0010925	-0.000213872	0.0455314		0.0261858	-0.00211167	0.0184377	-0.00284283		-0.000658942	-0.0019311	-0.0012593	-0.00159161
Sudden fusion rate (32min-0min)/2	0.0142425	0.0200254	0.0106132	0.00524157		0.184687	0.19458	0.180327	0.00580255		0.0374858	-0.00237621	0.0433823	0.00274566		0.0580066	0.00391818	0.0281654	0.00490951
STD (initial fusion rate (5min-0min)/5)	0.00736234	0.00625111	0.00666806	0.00886587		0.000468598	0.00162126	0.000766047	0.00896484		0.00459474	0.00298196	0.00650617	0.00346245		0.00295257	0.00182007	0.00267283	0.00652786
STD (Sudden fusion rate (32min-0min)/2)	0.0141108	0.0062076	0.00723229	0.00475417		0.0453278	0.0295345	0.0239845	0.00225349		0.0157644	0.00789927	0.0178893	0.00434049		0.0157766	0.00815348	0.0200827	0.00730664
